# Supplementary material for: Ultrafast, OSDA-free synthesis of mordenite zeolite
Source: Royal Society of Chemistry journal article supplement (doi:10.1039/c6ce02237e), 2016-12-08
Supplement: c6ce02237e1.pdf [file c6ce02237e1.pdf]

## Supporting Information

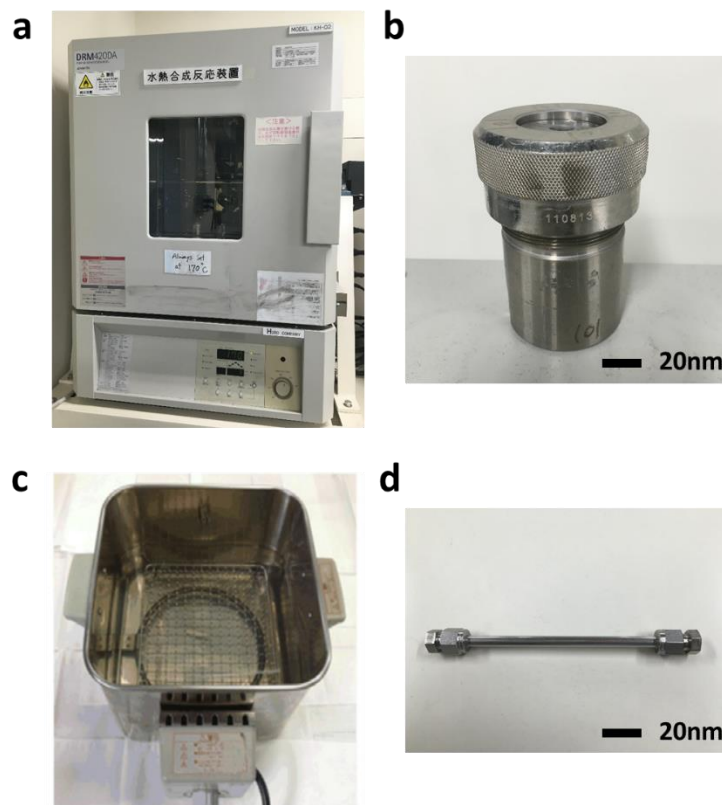

**Figure S1.** Photographs of the reactors as well as the heating tools used for the synthesis of mordenite. a, the air-circulating oven; b, the stainless steel Teflon<sup>®</sup>-lined autoclave (23 ml); c, the pre-heated oil bath; d, the tubular reactor.

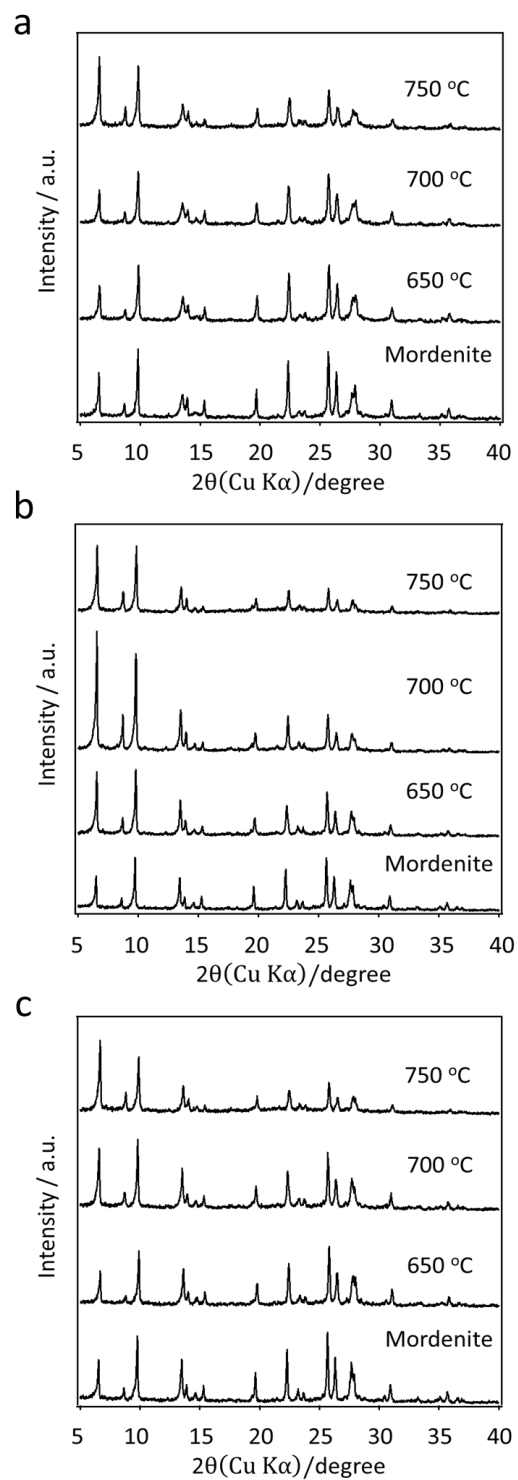

**Figure S2.** XRD patterns of the calcined mordenite samples. Note that calcination temperature are 650 °C, 700 °C and 750 °C, respectively. a, Mordenite sample synthesized in conventional autoclave without addition of seed; b, Mordenite sample synthesized with raw mordenite seed in tubular reactor; c, Mordenite sample synthesized with milled mordenite seed in tubular reactor.

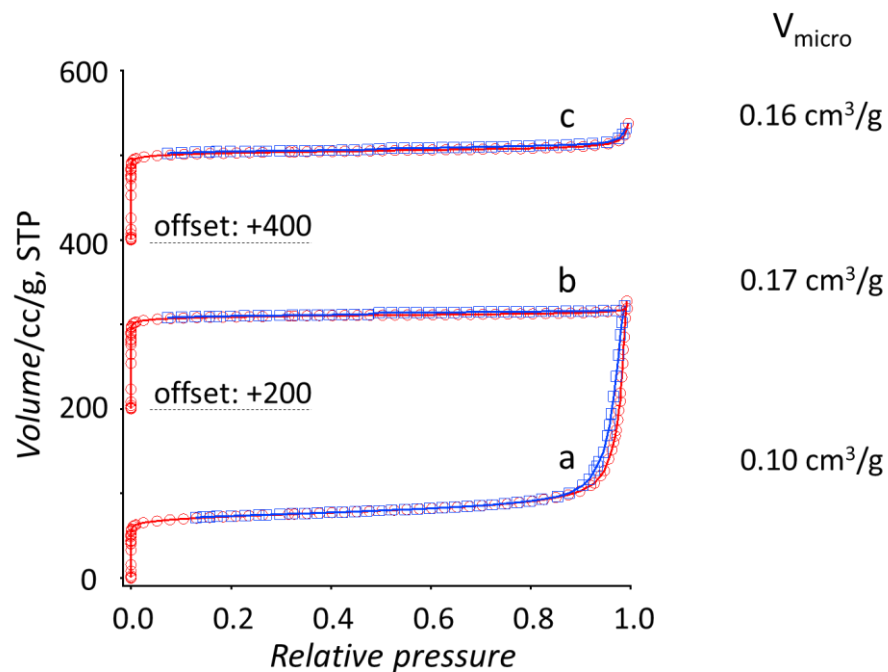

**Figure S3.** N<sub>2</sub> adsorption-desorption isotherms and micropore volume of mordenite seed and samples. a, N<sub>2</sub> adsorption-desorption curve of milled mordenite seed; b, N<sub>2</sub> adsorption-desorption curve of mordenite synthesized in conventional autoclave; c, N<sub>2</sub> adsorption-desorption curve of mordenite synthesized with milled mordenite seed.
